# Supplementary material for: Adsorption of radioactive iodine on surfactant-modified sodium niobate
Source: Royal Society of Chemistry journal article supplement (doi:10.1039/c6ra18091d), 2016-01-01
Supplement: c6ra18091d1.pdf [file c6ra18091d1.pdf]

# Supporting information

## **Adsorption of radioactive iodine on surfactant-modified sodium niobate**

Wanjuan Mu, Qianhong Yu, Xingliang Li, Hongyuan Wei, Yuan Jian\*

*Institute of Nuclear Physics and Chemistry, China Academy of Engineering Physics,  
64# Mianshan Road, Mianyang, 621900, Sichuan Province, P. R. China*

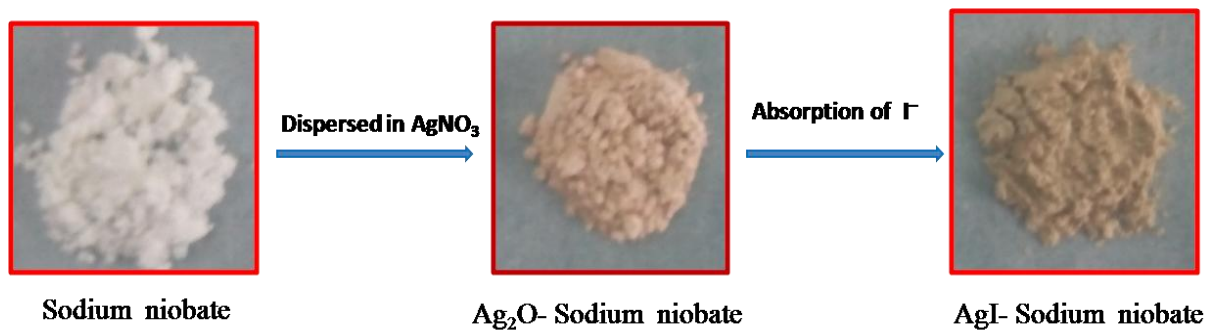

Fig.1 The photos of the sodium niobate nanofibers (before and after deposition of Ag<sub>2</sub>O nanocrystals and subsequent adsorption of I<sup>-</sup> anions)

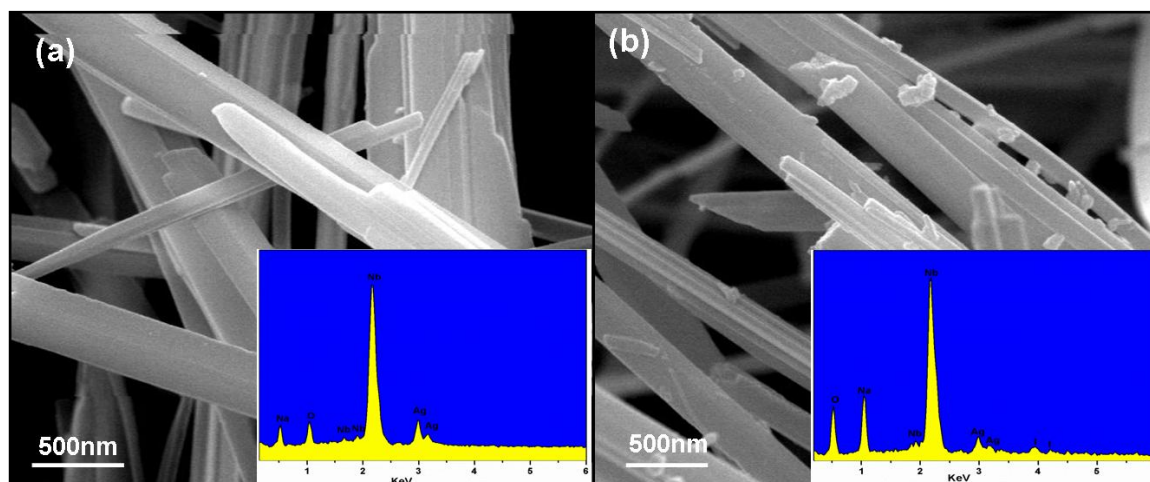

Fig.2 SEM images of  $Ag_2O$ -SNF before and after  $I^-$  anions adsorption

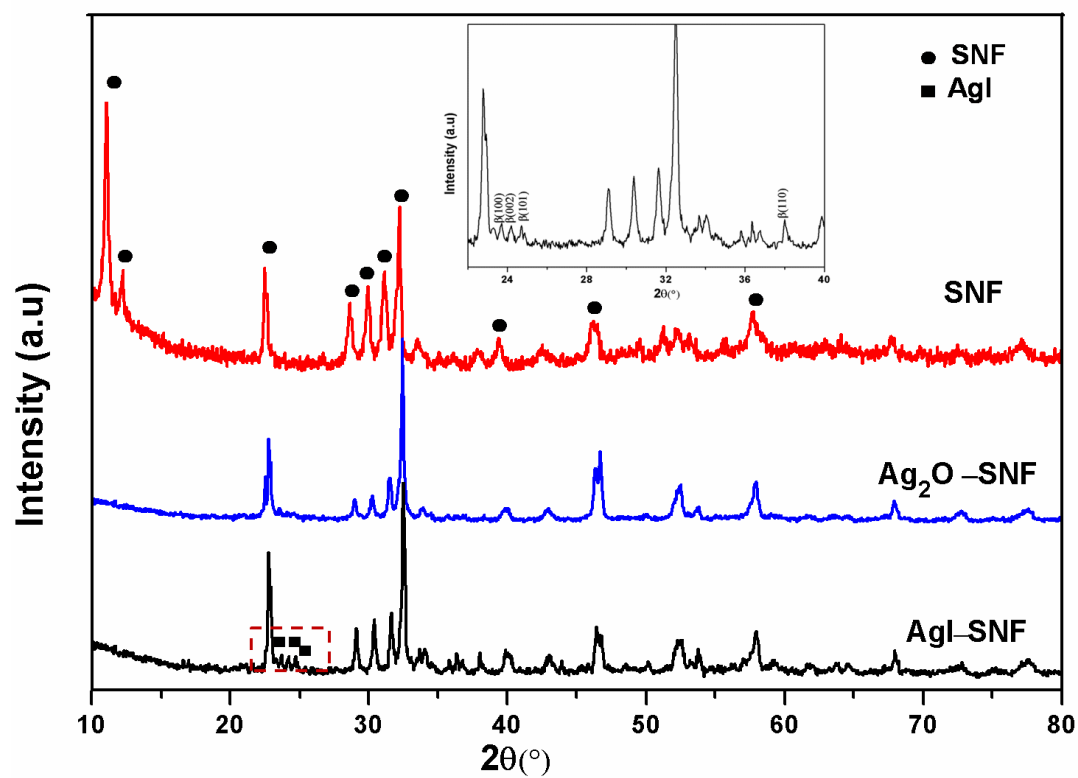

Fig.3 XRD patterns of sodium niobate nanofibers (SNF), Ag<sub>2</sub>O anchored sodium niobate nanofibers (Ag<sub>2</sub>O-SNF) and AgI anchored sodium niobate nanofibers (AgI-SNF)

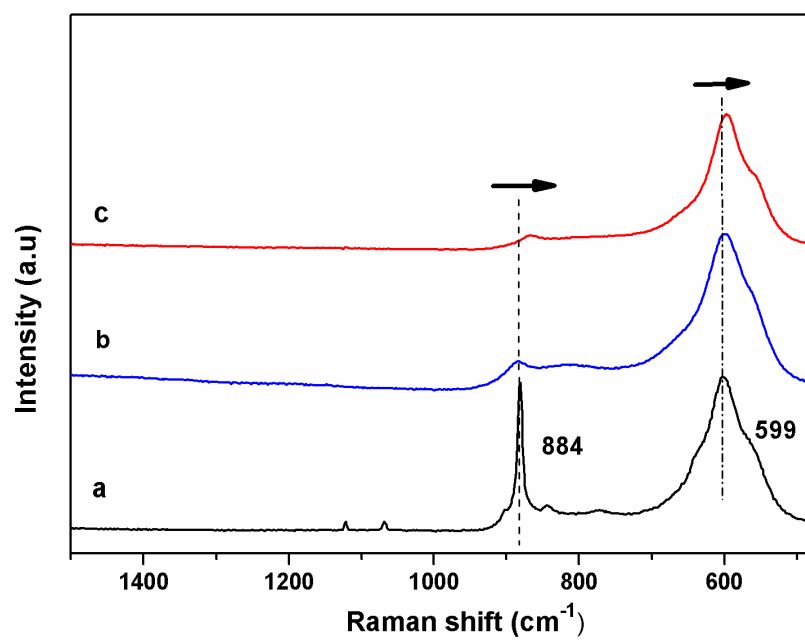

Fig.4 Raman spectra of (a) SNF, (b)  $\text{Ag}_2\text{O}$ -SNF and (c) AgI-SNF
